# Supplementary material for: Intermediate Molecular Phenotypes to Identify Genetic Markers of Anthracycline-Induced Cardiotoxicity Risk
Source: Cells. 2023 Jul 27;12(15):1956. doi: 10.3390/cells12151956 (PMC10417374; doi:10.3390/cells12151956)
Supplement: Supplementary file 1 [file cells-12-01956-s001.zip]

Archive with 12 entries (12 files):
- Supplementary Figures_S1-S4.pdf
- Supplementary_Methods_.pdf
- Table_S1.xlsx
- Table_S10.xlsx
- Table_S2.xlsx
- Table_S3.xlsx
- Table_S4.xlsx
- Table_S5.xlsx
- Table_S6.xlsx
- Table_S7.xlsx
- Table_S8.xlsx
- Table_S9.xlsx
