# Supplementary material for: Intermediate Molecular Phenotypes to Identify Genetic Markers of Anthracycline-Induced Cardiotoxicity Risk
Source: Cells. 2023 Jul 27;12(15):1956. doi: 10.3390/cells12151956 (PMC10417374; doi:10.3390/cells12151956)
Supplement: Supplementary file 1 [file cells-12-01956-s001.zip › Table_S1.xlsx]

## Sheet: Table S1
		A) Comparison of cardiotoxicity between FVB and F1 mouse strains
		Chemotherapy	Fibrosis		FVB	F1	P-value
					Median (IR), n= 9	Median (IR), n = 9
		Doxorubicin	Fibrosis	Global	3021.54 [2289.88 - 5616.55]	2878.565 [1609.348 - 7093.745]	0.7518
				Subendocardial	3448.22 [2082.8 - 5876.08]	2260.41 [1860.805 - 8279.49]	0.6588
				Subepicardial	3013.52 [2103.425 - 4686.55]	2949.76 [1357.89 - 5224.48]	0.7911
		Combined Therapy	Fibrosis	Global	3389.415 [2851.363-3762.225]	5223.955 [3757.53 - 6455.64]	0.0149
				Subendocardial	3261.41 [3063.2 - 4549.94]	5459.13 [4803.38 - 9101.9]	0.0043
				Subepicardial	3028.33 [2324.705 - 3745.085]	3328.07 [2338.07 - 5479.36]	0.7508
		B) Comparison of cardiotoxicity between doxorubicin and combined therapy in the F1BX mice
		Mouse strain	Pathophenotype of CDA		Doxorubicin	Combined therapy	P-value
					Median (IR) n = 70	Median (IR), n = 60
		F1BX		Global	3026.165 [1837.784 - 5297.738]	3908.345 [3118.474 - 5311.09]	0.0066
			Fibrosis	Subendocardial	3427.905 [1914.46 - 6310.825]	4584.905 [3669.25 - 6514.328]	0.0083
				Subepicardial	2379.77 [1655.31 - 4665.09]	3157.795 [2447.795 - 4183.433]	0.0546
				Global	84.04787 [72.05463 - 92.01615]	84.25263 [73.71179 - 90.94971]	0.7632
			Cardiomyocyte area	Subendocardial	87.15781 [75.9641 - 95.97941]	85.53541 [73.28827 - 92.51368]	0.2796
				Subepicardial	80.73318 [71.82021 - 88.10924]	83.5782 [72.72428 - 89.77585]	0.2714
		C) Comparison of the degree of cardiotoxicity in subendocardial versus subepicardial zones in the F1BX mice
		Chemotherapy		Mouse strain	Pathophenotype of CDA	Subendocardial zone	Subepicardial zone	P-value
						Median (IR)	Median (IR)
		Doxorubicin		F1BX (N= 70)	Fibrosis	3427.905 [1914.46 - 6310.825]	2379.77 [1655.31 - 4665.09]	0.0721
					Cardiomyocyte area	87.15781 [75.9641 - 95.97941]	80.73318 [71.82021 - 88.10924]	0.0098
		Combined Therapy		F1BX (N= 60)	Fibrosis	4584.905 [3669.25 - 6514.328]	3157.795 [2447.795 - 4183.433]	<0.001
					Cardiomyocyte area	85.53541 [73.28827 - 92.51368]	83.5782 [72.72428 - 89.77585]	0.3024
