# Supplementary material for: Intermediate Molecular Phenotypes to Identify Genetic Markers of Anthracycline-Induced Cardiotoxicity Risk
Source: Cells. 2023 Jul 27;12(15):1956. doi: 10.3390/cells12151956 (PMC10417374; doi:10.3390/cells12151956)
Supplement: Supplementary file 1 [file cells-12-01956-s001.zip › Table_S2.xlsx]

## Sheet: Table S2
		A.		Fibrosis	R	P-value
		Whole Cohort	Doxorubicin (N= 70)	Global fibrosis	0.1718	0.1549
				Subendocardial fibrosis	0.117	0.3349
				Subepicardial fibrosis	0.2123	0.0776
			Combined therapy (N= 60)	Global fibrosis	0.3981	0.0016
				Subendocardial fibrosis	0.3059	0.0175
				Subepicardial fibrosis	0.3932	0.0019
		Young mice	Doxorubicin (N= 27)	Global fibrosis	0.1411	0.4826
				Subendocardial fibrosis	0.0754	0.7084
				Subepicardial fibrosis	0.2663	0.1793
				Global fibrosis	0.1702	0.3773
			Combined therapy (N= 29)	Subendocardial fibrosis	0.2983	0.116
				Subepicardial fibrosis	0.0118	0.9515
		Old Mice	Doxorubicin (N= 43)	Global fibrosis	0.4187	0.0052
				Subendocardial fibrosis	0.4701	0.0015
				Subepicardial fibrosis	0.3177	0.0379
			Combined therapy (N= 31)	Global fibrosis	0.4128	0.021
				Subendocardial fibrosis	0.2509	0.1735
				Subepicardial fibrosis	0.4815	0.0061
		B.		Cardiomyocyte Area	R	P-value
		Doxorrubicin	Whole cohort (N=70)	Global cardiomyocyte area	0.1564	0.1961
			Young mice (N = 27)		0.0174	0.9313
			Old mice (N=43)		0.012	0.9391
		Combined Therapy	Whole cohort (N= 60)		0.1007	0.4441
			Young mice (N = 29)		-0.0273	0.888
			Old mice (N = 31)		-0.1107	0.5533
