# Supplementary material for: Intermediate Molecular Phenotypes to Identify Genetic Markers of Anthracycline-Induced Cardiotoxicity Risk
Source: Cells. 2023 Jul 27;12(15):1956. doi: 10.3390/cells12151956 (PMC10417374; doi:10.3390/cells12151956)
Supplement: Supplementary file 1 [file cells-12-01956-s001.zip › Table_S3.xlsx]

## Sheet: Table S3
		A. DOXORUBICIN
		Patophenotypes		Mice	Intermediate phenotypes	R	P-value
		Fibrosis	Global Heart	All mice	γH2AX(S139)	-0.232058	0.0514961
					p70S6K(T412)	-0.268035	0.0238251
					miR200b-3p	-0.251981	0.0340165
				Young mice	p70S6K(T412)	-0.420486	0.0258808
				Old mice	γH2AX(S139)	-0.356266	0.0190334
					JNK(T183/Y185)	-0.300815	0.0499821
					miR200b-3p	-0.304289	0.0472692
			Subendocardial zone	All mice	γH2AX(S139)	-0.260033	0.0285238
					p70S6K(T412)	-0.272807	0.0213491
				Young mice	p70S6K(T412)	-0.421865	0.0253471
				Old mice	γH2AX(S139)	-0.347768	0.0223063
			Subepicardial zone	All mice	p70S6K(T412)	-0.258105	0.0297655
					STAT3(S727)	-0.23345	0.0500741
					miR200b-3p	-0.257933	0.0298785
				Young mice	NC	n.a.	n.a.
				Old mice	γH2AX(S139)	-0.337448	0.0269013
					JNK(T183/Y185)	-0.357445	0.0186133
					STAT3(S727)	-0.316986	0.0383485
					miR200b-3p	-0.320598	0.0360792
		A. DOXORUBICIN
		Patophenotypes		Mice	Intermediate phenotypes	R	P-value
		Cardiomyocyte Area	Global Heart	All mice	NC	n.a.	n.a.
				Young mice	NC	n.a.	n.a.
				Old mice	γH2AX(S139)	0.325458	0.0332009
					Let 7d-5p	-0.322561	0.0348929
			Subendocardial zone	All mice	NC	n.a.	n.a.
				Young mice	let 7e-5p	0.408867	0.0307483
				Older mice	γH2AX(S139)	0.322195	0.0351114
					Let 7d-5p	-0.387345	0.0102821
			Subepicardial zone	All mice	NC	n.a.	n.a.
				Young mice	NC	n.a.	n.a.
				Old mice	γH2AX(S139)	0.312407	0.0413917
		B. COMBINED TREATMENT
		Patophenotypes		Mice	Intermediate phenotypes	R	P-value
		Fibrosis	Global Heart	All mice	NC	n.a.	n.a.
				Young mice	CREB1(S133)	0.508374	0.00486549
				Old mice	βTubulin	-0.379435	0.0352701
					miR361-5p	-0.356855	0.0487625
					miR200b-3p	-0.36371	0.0442926
					miR451a	-0.380242	0.0348509
			Subendocardial zone	All mice	miR200b-3p	-0.275914	0.0328532
				Younger mice	CREB1(S133)	0.448768	0.014612
				Older mice	miR361-5p	-0.377016	0.0365524
					miR200b-3p	-0.394355	0.0281434
					miR451a	-0.397984	0.0266009
			Subepicardial zone	All mice	pP53(S15)	-0.280999	0.0296415
					βTubulin	-0.266133	0.039848
					STAT3 (S727)	-0.258614	0.0460256
				Younger mice	CREB(S133)	0.408867	0.0276484
				Older mice	pP53(S15)	-0.394185	0.0282175
					βTubulin	-0.439516	0.0133637
					CREB1(S133)	-0.408106	0.0226603
					STAT3(S727)	-0.497832	0.00437436
		B. COMBINED TREATMENT
		Patophenotypes		Mice	Intermediate phenotypes	R	P-value
		Cardiomyocyte Area	Global Heart	All mice	Caspase3	-0.28066	0.0298472
					NFκB(S536)	-0.256838	0.047594
					p38MAPK(T180/Y182)	-0.363323	0.00432684
					AKT1(S473)	-0.317752	0.0133607
				Younger mice	p70S6K(T412)	-0.403311	0.0300479
				Older mice	γH2AX(S139)	0.365012	0.0434815
					JNK(T183/Y185)	-0.407661	0.0228226
					p38MAPK(T180/Y182)	-0.578226	0.000656791
					AKT(S473)	-0.361674	0.0455842
					p70S6K(T412)	0.404061	0.0241728
			Subendocardial zone	All mice	Caspase3	-0.292833	0.023172
					p38MAPK(T180/Y182)	-0.312531	0.0150501
					AKT1(S473)	-0.268147	0.0383152
				Younger mice	NC	n.a.	n.a.
				Older mice	γH2AX(S139)	0.36138	0.0457733
					JNK(T183/Y185)	-0.383065	0.0334151
					AKT1(S473)	-0.51521	0.003
					p38MAPK(T180/Y182)	-0.56371	0.000958654
					p70S6K(T412)	0.40362	0.0243428
			Subepicardial zone	All mice	p38MAPK(T180/Y182)	-0.377994	0.00290455
					AKT1(S473)	-0.330786	0.00983797
				Younger mice	p70S6K(T412)	-0.438283	0.0174004
				Older mice	γH2AX(S139)	0.352099	0.0520694
					p38MAPK(T180/Y182)	-0.594758	0.000417662
					JNK(T183/Y185)	-0.3839	0.033
					p70S6K(T412)	0.454817	0.0101508
