# Supplementary material for: Intermediate Molecular Phenotypes to Identify Genetic Markers of Anthracycline-Induced Cardiotoxicity Risk
Source: Cells. 2023 Jul 27;12(15):1956. doi: 10.3390/cells12151956 (PMC10417374; doi:10.3390/cells12151956)
Supplement: Supplementary file 1 [file cells-12-01956-s001.zip › Table_S4.xlsx]

## Sheet: Table S4
		A.1) DOXORUBICIN: Fibrosis
		Model-1: Global heart: Whole Cohort of Mice
		Variables selected	Non-standardized coefficients		t	P-value	95.0% confidence interval for β
			β	Standard Error			Lower limit	Upper limit
		Constant	5454.81	662.624	8.232	0	4131.84	6777.78
		P70S6K(T412)	-77.907	31.728	-2.455	0.017	-141.254	-14.559
		Model-2: Global heart: Young Mice
		Variables selected	Non-standardized coefficients		t	P-value	95.0% confidence interval for β
			β	Standard Error			Lower limit	Upper limit
		Constant	6929.83	1105.05	6.271	0	4653.94	9205.72
		P70S6K(T412)	-189.728	70.543	-2.69	0.013	-335.014	-44.442
		Model-3: Global heart: Old Mice
		Variables selected	Non-standardized coefficients		t	P-value	95.0% confidence interval for β
			β	Standard Error			Lower limit	Upper limit
		Constant	5271.36	695.096	7.584	0	3866.52	6676.21
		ɤH2AX(S139)	-122.143	49.017	-2.492	0.017	-221.209	-23.077
		Model-4: Subendocardial Zone: Whole Cohort of Mice
		Variables selected	Non-standardized coefficients		t	P-value	95.0% confidence interval for β
			β	Standard Error			Lower limit	Upper limit
		Constant	6135.97	734.53	8.354	0	4669.01	7602.93
		P70S6K(T412)	-96.249	35.152	-2.738	0.008	-166.452	-26.047
		Let 7c_5p	353.373	145.34	2.431	0.018	63.109	643.636
		Model-5: Subendocardial Zone: Young Mice
		Variables selected	Non-standardized coefficients		t	P-value	95.0% confidence interval for β
			β	Standard Error			Lower limit	Upper limit
		Constant	2194.81	400.031	5.487	0	1374.01	3015.6
		P70S6K(T412)	-96.833	35.913	-2.696	0.009	-168.496	-25.171
		Model-6: Subendocardial Zone: Old Mice
		Variables selected	Non-standardized coefficients		t	P-value.	95.0% confidence interval for β
			β	Standard Error			Lower limit	Upper limit
		Constant	4611.65	371.997	12.397	0	3850.83	5372.47
		Let 7c_5p	334.513	152.155	2.199	0.031	30.726	638.299
		Model-7: Subepicardial Zone: Whole Cohort of Mice
		Variables selected	Non-standardized coefficients		t	P-value	95.0% confidence interval for β
			β	Standard Error			Lower limit	Upper limit
		Constant	4339.44	553.406	7.841	0	3234.21	5444.67
		miR210_3p	4.972	1.031	4.823	0	2.913	7.031
		P70S6K(T412)	-67.383	26.306	-2.561	0.013	-119.92	-14.846
		Model-8: Subepicardial Zone: Young Mice
		Variables selected	Non-standardized coefficients		t	P-value	95.0% confidence interval for β
			β	Standard Error			Lower limit	Upper limit
		Constant	5130.62	1047.84	4.896	0	2963.01	7298.23
		P70S6K(T412)	-153.585	62.946	-2.44	0.023	-283.799	-23.371
		miR 214_5p	1350.67	563.742	2.396	0.025	184.483	2516.86
		Model-9: Subepicardial Zone: Old Mice
		Variables selected	Non-standardized coefficients		t	P-value	95.0% confidence interval for β
			β	Standard Error			Lower limit	Upper limit
		Constant	4159.79	525.526	7.915	0	3096.81	5222.77
		Let 7d_5p	0.002	0	5.598	0	0.002	0.003
		ɤH2AX(S139)	-88.003	36.615	-2.403	0.021	-162.063	-13.942
		A.2) DOXORUBICIN: Cardiomyocyte Area
		Model-10: Global heart: Old Mice
		Variables selected	Non-standardized coefficients		t	P-value	95.0% confidence interval for β
			β	Standard Error			Lower limit	Upper limit
		Constant	78.841	3.042	25.913	0	72.692	84.99
		Let7d_5p	0.481	0.215	2.243	0.03	0.048	0.915
		B.1) COMBINED THERAPY: Fibrosis
		Model-11: Global heart fibrosis in the young mice
		Variables selected	Non-standardized coefficients		t	P-value	95.0% confidence interval for β
			β	Standard Error			Lower limit	Upper limit
		Constant	2941.93	380.055	7.741	0	2162.12	3721.74
		CREB(S133)	3.007	1.06	2.837	0.009	0.832	5.181
		Model-12: Subepicardial Zone fibrosis in the whole cohort of mice
		Variables selected	Non-standardized coefficients		t	P-value	95.0% confidence interval for β
			β	Standard Error			Lower limit	Upper limit
		Constant	3963.68	283.139	13.999	0	3396.91	4530.44
		bTUBULIN	-0.379	0.175	-2.169	0.034	-0.73	-0.029
		Model-13: Subepicardial Zone fibrosis in the Young Mice
		Variables selected	Non-standardized coefficients		t	P-value	95.0% confidence interval for β
			β	Standard Error			Lower limit	Upper limit
		Constant	2194.81	400.031	5.487	0	1374.01	3015.6
		CREB(S133)	2.804	1.115	2.514	0.018	0.516	5.093
		Model-14: Subepicardial Zone fibrosis in the Old Mice
		Variables selected	Non-standardized coefficients		t	P-value	95.0% confidence interval for β
			β	Standard Error			Lower limit	Upper limit
		Constant	4611.65	371.997	12.397	0	3850.83	5372.47
		P53	-52.528	21.405	-2.454	0.02	-96.308	-8.749
		B.2) COMBINED THERAPY: Cardiomyocyte Area
		Model-15: Global heart in the whole cohort of mice
		Variables selected	Non-standardized coefficients		t	P-value	95.0% confidence interval for β
			β	Standard Error			Lower limit	Upper limit
		Constant	93.133	3.875	24.036	0	85.376	100.889
		P38MAPK(T180/Y182)	-0.001	0.001	-2.233	0.03	-0.002	0
		Model-16: Global heart in the old mice
		Variables selected	Non-standardized coefficients		t	P-value	95.0% confidence interval for β
			β	Standard Error			Lower limit	Upper limit
		Constant	101.373	5.671	17.875	0	89.774	112.972
		AKT(S473)	-0.511	0.24	-2.127	0.043	-1.005	-0.017
		P38MAPK(T180/Y182)	-0.02	0.01	-2.07	0.048	-0.003	0
		Model-17: Subendocardial zone in the old mice
		Variables selected	Non-standardized coefficients		t	P-value	95.0% confidence interval for β
			β	Standard Error			Lower limit	Upper limit
		Constant	102.311	5.725	17.872	0	90.544	114.078
		AKT(S473)	-0.296	0.095	-3109	0.005	-0.492	-0.1
		P38MAPK(T180/Y182)	-0.001	0	-2183	0.038	-0.001	0
		Model-18: Subepicardial zone in the whole cohort of mice
		Variables selected	Non-standardized coefficients		t	P-value	95.0% confidence interval for β
			β	Standard Error			Lower limit	Upper limit
		Constant	88.434	3.204	27.599	0	82.017	94.85
		P38MAPK(T180/Y182)	-0.001	0	-2132	0.037	-0.001	0
		Model-19: Subepicardial zone in the old mice
		Variables selected	Non-standardized coefficients		t	P-value	95.0% confidence interval for β
			β	Standard Error			Lower limit	Upper limit
		Constant	102.311	5.725	17.872	0	90.544	114.078
		P70S6K(T412)	1.649	0.591	2.788	0.01	0.431	2.867
