# Supplementary material for: Intermediate Molecular Phenotypes to Identify Genetic Markers of Anthracycline-Induced Cardiotoxicity Risk
Source: Cells. 2023 Jul 27;12(15):1956. doi: 10.3390/cells12151956 (PMC10417374; doi:10.3390/cells12151956)
Supplement: Supplementary file 1 [file cells-12-01956-s001.zip › Table_S5.xlsx]

## Sheet: Table S5
		DOXO FIBROSIS IN GLOBAL HEART
			Estimate (Beta)	Standard Error	t-value	P-value
		Intercept	3116.62	1795.72	1.73558	0.0875274
		Age	41.9846	22.1151	1.89846	0.0622183
		H2AX	-97.9092	47.6716	-2.05383	0.044148
		p70S6K	-80.4969	31.3622	-2.56669	0.0126558
		RQ_mir_200b_3p	-0.0542563	0.117083	-0.463399	0.644676
		DOXO FIBROSIS IN SUBENDOCARDIAL ZONE
			Estimate (Beta)	Standard Error	t-value	P-value
		Intercept	3972.1	1961.98	2.02453	0.046965
		Age	43.0766	24.7258	1.74217	0.0861369
		H2AX	-105.934	54.5842	-1.94074	0.0565628
		p70S6K	-100.575	35.6583	-2.82054	0.00632545
		DOXO FIBROSIS IN SUBEPICARDIAL ZONE
			Estimate (Beta)	Standard Error	t-value	P-value
		Intercept	1904.55	1803.16	1.05623	0.294897
		Age	35.0477	21.6879	1.616	0.111091
		STAT3	4.48777	11.2108	0.40031	0.690283
		p70S6K	-80.9229	37.7495	-2.14368	0.0359254
		RQ_mir_200b_3p	-0.0156541	0.116233	-0.134678	0.893295
		COMBINED THERAPY FIBROSIS IN GLOBAL HEART
			Estimate (Beta)	Standard Error	t-value	P-value
		Intercept	1530.84	803.467	1.90529	0.0617034
		Age	37.2318	10.4098	3.57661	0.000710297
		COMBINED THERAPY IN SUBENDOCARDIAL ZONE
			Estimate (Beta)	Standard Error	t-value	P-value
		intercept	2186.61	1221.24	1.79049	0.0788797
		Age	39.7329	15.6895	2.53246	0.0142106
		RQ_mir_200b_3p	-0.0288366	0.0581578	-0.495835	0.621987
		COMBINED THERAPY FIBROSIS SUBEEPICARDIAL ZONE
			Estimate (Beta)	Standard Error	t-value	P-value
		intercept	1750.96	867.036	2.01948	0.0483209
		Age	31.023	9.96705	3.11256	0.00294102
		Tubulin	-0.305326	0.182506	-1.67296	0.100014
		p53	-13.163	13.898	-0.94711	0.347725
		STAT3	-0.489011	3.68459	-0.132718	0.894901
