# Supplementary material for: Intermediate Molecular Phenotypes to Identify Genetic Markers of Anthracycline-Induced Cardiotoxicity Risk
Source: Cells. 2023 Jul 27;12(15):1956. doi: 10.3390/cells12151956 (PMC10417374; doi:10.3390/cells12151956)
Supplement: Supplementary file 1 [file cells-12-01956-s001.zip › Table_S6.xlsx]

## Sheet: Table S6
		A.) ipQTLs linked to molecular levels in the myocardium after doxorubicin chemotherapy
		Intermediate Phenotype		ipQTL	Chr.	Marker Peak	Confidence Interval (0.05)	Location		LOD Score	Average ± SEM		Higher Effect Allele
								(cM)	(Mb)		FF	FB
		All mice	ɤH2AX(S139)				rs13476963	2.5188	9.9791
				dox-ipQTL 2	3	rs3676039		72.463	148.368	1.55	6.764033±1.374646	12.226597±1.442966	FB
							rs13477494	85.6201	165.505
							rs6256504	24.6198	44.9499
				dox-ipQTL 3	5	c5.loc62.5		65.2299	126.914	2.3	5.869736±1.423482	12.418316±1.330643	FB
							c5.loc72.5	75.2299	135.491
			P70S6K(T412)				rs3660863	4.4479	10.0633
				dox-ipQTL 13	4	c4.loc90		94.4479	166.469	2	19.56659±1.93854	10.12099±2.287899	FF
							rs6279100	97.477	171.802
							c18.loc25	27.3969	50.6001
				dox-ipQTL 14	18	c18.loc47.5		49.8969	73.7552	1.75	20.04846±2.138543	11.4262±2.0808	FF
							rs4137441	61.306	92.981
			STAT3(S727)				c4.loc40	44.4479	96.3355
				dox-ipQTL 15	4	rs3023025		89.4626	157.694	1.87	77.08783±6.442248	46.57971±7.486945	FF
							rs6279100	97.477	171.802
							rs6322899	6.997	15.1071
				dox-ipQTL 16	14	CEL-14_94845626		60.763	117.3	2.22	48.96±6.566847	81.83692±7.124426	FB
							CEL-14_116404928	72.259	135.786
							c17.loc7.5	9.538	16.3105
				dox-ipQTL 17	17	rs6409750		31.0949	59.704	1.51	81.09213±7.943287	53.26018±6.328161	FF
							rs4231720	60.393	91.1225
							rs13483183	2.3969	3.77452
				dox-ipQTL 18	18	rs13483466		59.113	89.6559	1.72	77.99455±6.843996	49.25563±7.06964	FF
							rs4137441	61.306	92.981
		Young mice	P70S6K(T412)				rs13476963	2.5188	9.9791
				dox-ipQTL 51	3	rs13477494		85.62	165.505	1.88	17.0027±2.55619	6.08478±2.349889	FF
							CEL-3_159340478	89.5674	173.05
							rs3660863	4.4479	10.0633
				dox-ipQTL 52	4	rs13478089		95.041	167.513	3.32	17.1692±2.04317	3.20716±2.30256	FF
							rs6279100	97.477	171.802
							rs13462199	29.127	53.1673
				dox-ipQTL 53	9	rs13480399		63.204	112.771	1.64	17.60386±2.83393	7.0130123±2.239358	FF
							rs6304156	77.3298	127.707
									0
							c17.loc2.5	4.538	6.94947
				dox-ipQTL 54	17	rs3675634		49.49	78.6722	1.83	19.003257±3.192696	7.4622109±2.089872	FF
							rs4231720	60.393	91.1225
		Old mice	ɤH2AX(S139)				rs13476969	2.8639	10.8388
				dox-ipQTL 76	3	rs3676039		72.463	148.368	2.14	6.696371316±1.7560756	14.898239±1.702939	FB
							rs13477494	85.6201	165.505
							rs13478154	15.981	30.1557
				dox-ipQTL 77	5	gnf05.110.207		60.529	119.986	1.87	6.18636±1.970270897	14.103906±1.62364018	FB
							rs13478540	80.5377	141.862
							gnf12.061.363	33.694	76.5125
				dox-ipQTL 78	12	rs3655558		39.086	84.2768	2.34	6.493692148±1.75706845	14.954787776±1.67829	FB
							rs13481614	57.1239	106.567
			JNK(T183/Y185)				rs6213083	2.8084	4.64096
				dox-ipQTL 81	2	rs3674936		19.062	26.8496	1.9	1091.7346±96.613145	678.91026±90.9842036	FF
							rs13476860	88.295	168.078
			STAT3(S727)				rs13483183	2.3969	3.77452
				dox-ipQTL 86	18	rs13483466		59.113	89.6559	1.84	89.46099±8.50096	51.0436609±9.25309	FF
							rs4137441	61.306	92.981
		B.) ipQTLs linked to molecular levels in the myocardium after the combined chemotherapy
		Intermediate Phenotype		ipQTL	Chr.	Marker Peak	Confidence Interval (0.05)	Location		LOD Score	Average ± SEM		Higher Effect Allele
								(cM)	(Mb)		FF	FB
		All mice	NFκB(S536)				c2.loc5	7.8084	10.547
				comb-ipQTL 7	2	rs3664661		48.8468	81.2701	1.87	45.71154±4.118365	29.02941±3.601406	FF
							rs13476698	63.111	129.704
							rs6254381	39.75	84.2224
				comb-ipQTL 8	4	c4.loc67.5		71.9479	140.652	1.53	43.29688±3.761243	28.21429±4.020938	FF
							rs6279100	97.477	171.802
							rs3664617	2.7299	5.036
				comb-ipQTL 9	5	mCV22996021		43.1436	85.3838	1.62	44.51786±4.007263	29.03125±3.748452	FF
							c5.loc85	87.7299	147.927
							rs13482418	1.958	4.37516
			P38MAPK(T180/Y182)	comb-ipQTL 10	15	CEL-15_9687257		6.8709	13.8108	1.88	16899.74±1076.759	11992.57±1190.402	FF
							rs13482751	62.1624	109.043
		Young mice					rs6213083	2.8084	4.64096
			CREB1(S133)	comb-ipQTL 29	2	rs13476691		62.686	128.871	1.65	420.5909±52.6107	223.77±41.127	FF
							c2.loc77.5	80.3084	159.805
		Old mice	P53(S15)				c6.loc40	41.9159	93.2052
				comb-ipQTL 51	6	rs4138572		49.21	106.655	2.74	276.666±19.847307	266.92307±23.35426	FF
							c6.loc65	66.9159	137.572
							c8.loc7.5	10.729	21.2604
				comb-ipQTL 52	8	rs13479922		52.12	102.723	1.73	270.47058±20.448	275.14285±22.5328	FB
							c8.loc65	68.229	119.71
			βTubulin				c6.loc40	41.9159	88.5249
				comb-ipQTL 53	4	rs4138572		49.21	105.227	1.78	755.425±234.755668	1962.818±316.54447	FB
							c6.loc65	66.9159	134.556
			AKT1(S473)				rs3660863	4.4479	10.0633
				comb-ipQTL 58	4	rs3663744		19.432	37.0685	1.97	36.571428±3.91987	58.95±5.6804327	FB
							rs6279100	97.477	171.802
			STAT3(S727)				rs3660863	4.4479	10.0633
				comb-ipQTL 59	4	rs3663744		19.432	37.0685	2.08	36.571428±3.9198709	58.95±5.68043270078986	FB
							rs4224864	81.44	150.579
