# Supplementary material for: Intermediate Molecular Phenotypes to Identify Genetic Markers of Anthracycline-Induced Cardiotoxicity Risk
Source: Cells. 2023 Jul 27;12(15):1956. doi: 10.3390/cells12151956 (PMC10417374; doi:10.3390/cells12151956)
Supplement: Supplementary file 1 [file cells-12-01956-s001.zip › Table_S7.xlsx]

## Sheet: Table S6
	Chr.	cda-QTL	Therapy Cohort	Age Cohort	Pathophenotype	Condition QTL	Peak marker			5´extreme marker			3` extreme marker			LOD Score	Average ± SEM		Higher Effect Allele
							SNP	Location		SNP	Location		SNP	Location			FF	FC
								(cM)	(Mb)		(cM)	(Mb)		(cM)	(Mb)
	1	cda-QTL1	Doxorubicin	Young mice	Subendocardial Cardiomyocyte Area	ydcaQTL 5	rs13475834	22.3979	43.1463	rs13475701	1.769	4.67473	rs13476300	100.929	200.084	1.55	70.6764±6.006863	94.39228±5.72252	FB
	2	cda-QTL2	Doxorubicin	Old mice	Global Fibrosis	odifQTL 1	rs13476454	30.1429	52.5718	rs6240512	11.57	15.9883	rs3679483	110.359	193.308	1.72	2505.177955 ± 641.25716	4998.331234±550.2454	FB
					Subepicardial Fibrosis	odifQTL 4				CEL-2_32981944	26.969	44.3995				1.51	2210.53094±632.79331	4505.2952±549.3643	FB
						odifQTL 6				rs6240512	11.57	15.9883				1.51	2757.7376±749.77896	5512.1427±636.25009	FB
				The whole cohort of mice		difQTL 2				c2.loc7.5	10.3084	13.99				1.61606	2588.52±539.17	4699.21±525.78	FB
			Combined therapy		Global Cardiomyocyte Area	ccaQTL 1	rs13476503	37.469	64.0661	rs6213083	2.8084	4.64096	c2.loc72.5	75.3084	152.558	1.74	72.287708±3.5092467	85.94215±3.082206	FB
		cda-QTL3	Combined therapy	The whole cohort of mice	Subepicardial Cardiomyocyte Area	ccaQTL 4	rs13476636	56.552	109.256	c2.loc10	12.8084	17.9818	rs13476889	97.475	173.842	1.45326	76.58±2.96	86.98±2.55	FB
		cda-QTL4	Combined therapy	Young mice	Subepicardial Fibrosis	ycifQTL 4	rs6228179	68.004	137.783	c2.loc42.5	45.3084	76.8941	c2.loc72.5	75.3084	152.558	3.15	4229.208±332.4889	2492.85±223.04035	FF
					Global Fibrosis	ycifQTL 1	c2.loc67.5	70.3084	142.032	rs6213083	2.8084	4.64096	c2.loc95	97.8084	174.117	1.74	4753.34555±362.28538	3427.82975±243.0284	FF
					Global Cardiomyocyte Area	yccaQTL 1				c2.loc12.5	15.3084	23.363	rs6363071	82.395	161.92	1.84	72.84369±2.893576	83.785166±1.9410698	FB
					Subepicardial Cardiomyocyte Area	yccaQTL 3				c2.loc20	22.8084	34.2691	c2.loc77.5	80.3084	159.805	2.18	72.288±2.64757	83.327±1.7760446	FB
				The whole cohort of mice	Global Fibrosis	cifQTL 1	c2.loc70	72.8084	147.428	c2.loc15	17.8084	118.052	rs3679483	110.359	189.934	1.69	4986.90913±314.0011008	3911.0835±247.56783	FF
					Subepicardial Fibrosis	cifQTL 5				rs6222797	17.8084	25.7578	rs3679483			2.2	4181.0965±278.7518	3065.997±219.776249	FF
	3	cda-QTL5	Combined therapy	Old mice	Global Fibrosis	ocifQTL 1	CEL-3_159340478	89.5674	173.05	c3.loc10	12.5188	29.0222	CEL-3_159340478	89.5674	173.05	1.95	5740.015±402.9097	3983.0635±365.6346	FF
					Subendocardial Fibrosis	ocifQTL 4				rs13476963	2.5188	9.9791				1.57	6866.949±587.4006	4607.06±533.057	FF
	4	cda-QTL6	Doxorubicin	Old mice	Subendocardial Fibrosis	odifQTL 7	rs13478002	80.1759	149.721	rs6355837	73.6018	141.27	rs6279100	97.477	171.802	2.69	2726.3376±622.0757	6238.09096±666.4128	FB
					Global Cardiomyocyte Area	odcaQTL 1	rs4224864	81.44	150.579	c4.loc5	9.4479	22.0828				1.66	89.1425817±2.47716268	78.53896±2.6863857	FF
					Subendocardial Cardiomyocyte Area	odcaQTL 8						22.0828				1.78	93.766±2.73029335	81.5356239±2.9494025	FF
				The whole cohort of mice	Subepicardial Fibrosis	difQTL 3	rs13478089	95.0516	167.53	c4.loc2.5	6.9479	16.66	rs6279100	97.477	171.8	2.40504	2636.11±472.85	5231.84±582.02	FB
					Subendoncardial Fibrosis	difQTL 4				c4.loc30	34.4479	65.78				2.12549	3547.83±602.53	6628.36±719.19	FB
					Global Fibrosis	difQTL 1				c4.loc67.5	71.9479	140.65				2.49	2981.54708±500.74985	5697.9867±613.07332	FB
				Old mice	Global Fibrosis	odifQTL 2	rs13478068	97.06	171.068	c4.loc65	69.4479	137.061				2.29	2801.9797±525.782695	5620.02656±639.943009	FB
					Subepicardial Fibrosis	odifQTL 5				rs3660863	4.4479	10.0633				2.19	2506.65452±525.8644005	5039.76796±645.528969	FB
	5	cda-QTL7	Doxorubicin	Young mice	Subepicardial Cardiomyocyte Area	ydcaQTL 2	rs6402980	3.155	6.21345	rs3664617	2.7299	5.036	rs3718776	90.156	151.545	1.69	85.4388±3.9430558	70.18554±3.21657	FF
		cda-QTL8	Combined therapy	The whole cohort of mice	Subendocardial Fibrosis	cifQTL 9	rs3721607	44.965	91.3413	c5.loc22.5	25.2299	45.5649	rs3718776	90.156	151.545	2.16964	4138.45±400.73	5857.20±333.95	FB
					Global Fibrosis	cifQTL 2										2.16	3586.2076±293.465661	4850.10885±248.02375	FB
		cda-QTL9	Doxorubicin	Old mice	Subepicardial Cardiomyocyte Area	odcaQTL 5	rs3718776	90.156	151.545	rs3664617	2.7299	5.036	rs3718776	90.156	151.545	1.78	73.528079±2.295952	88.249924±2.468978	FB
	Chr.	cda-QTL	Therapy Cohort	Age Cohort	Pathophenotype	Condition QTL	Peak marker			5´extreme marker			3` extreme marker			LOD Score	Average ± SEM		Higher Effect Allele
							SNP	Location		SNP	Location		SNP	Location			FF	FC
								(cM)	(Mb)		(cM)	(Mb)		(cM)	(Mb)
	8	cda-QTL10	Doxorubicin	Young mice	Global Fibrosis	ydifQTL 1	rs4140004	15.518	26.84	rs6153168	3.229	8.41	c8.loc70	73.229	125.06	1.63	2158.659±1093.8555	6507.3346±904.37375	FB
					Subendocardial Fibrosis	ydifQTL 4	rs13479656	18.8077	31.8							1.66	2788.6816±1242.829037	7768.56103±1097.18812	FB
	10	cda-QTL11	Combined therapy	The whole cohort of mice	Subepicardial Fibrosis	cifQTL 6	rs13480601	25.271	50.3628	rs13459119	10.721	23.5309	c10.loc42.5	44.278	88.7831	2.55	2820.921±251.7372418	4043.7045±227.7049	FB
				Young mice	Global Fibrosis	ycifQTL 2					10.721	23.5309	rs3697243	73.8349	126.824	1.91	3263.533±268.0303	4547.7057±297.35294	FB
					Subepicardial Fibrosis	ycifQTL 5				rs3679120	11.4979	24.253	rs3676330	74.063	126.986	1.51	2498.85±284.028	3687.5615±315.1009	FB
				The whole cohort of mice	Subendocardial Cardiomyocyte Area	ccaQTL 5	c10.loc25	26.778	52.6745	rs3721803	1.778	7.13693	rs13480716	53.3815	102.474	1.88331	87.45±2.24	78.59±2.00	FF
					Global Cardiomyocyte Area	ccaQTL 2	c10.loc27.5	29.278	57.9569	rs3721803	1.778	7.13693	rs13480716	53.3815	102.474	1.51	86.74156±3.4157144	74.067819±3.2020166	FF
				Old mice	Subendocardial Cardiomyocyte Area	occaQTL 4	rs13480619	32.3354	62.2767	rs13480554	14.1457	26.7933	CEL-10_119602638	69.9355	121.772	1.59	91.167626±3.176368	79.194619±2.69939399	FF
				The whole cohort of mice	Global Fibrosis	cifQTL 3	rs13480630	37.0286	71.9495	gnf10.026.889	18.798	26.7933	rs13480657	43.3936	115.948	3.66	3560.174677±248.771069	5139.4339655±257.2063708	FB
					Subendocardial Fibrosis	cifQTL 10					18.798	34.0996	c10.loc60	61.778	114.578	2.95757	4226.55±343.81	6174.86±361.15	FB
				Old mice	Global Fibrosis	ocifQTL 2	CEL-10_71736974	39.92	80.3661	rs13480554	14.1457	26.7933	CEL-10_119602638	69.9355	121.772	1.66	3818.59076±427.376648	5468.3675±363.2003	FB
					Subendocardial Fibrosis	ocifQTL 5				rs13480578	21.4874	40.0988	c10.loc70	71.778	123.761	1.64	4275.845±606.0959	6603.966±515.08255	FB
	11	cda-QTL12	Combined therapy	Old mice	Global Fibrosis	ocifQTL 3	rs3700830	19.569	34.0465	c11.loc5	7.3605	12.3253	c11.loc57.5	59.8605	96.353	1.56	3957.048±400.63517	5544.7856±387.9133	FB
		cda-QTL13	Combined therapy	The whole cohort of mice	Subendocardial Fibrosis	cifQTL 11	rs13481076	42.678	69.4671	c11.loc15	17.3605	30.0551	c11.loc57.5	59.8605	96.353	2.62206	4275.38±348.20	6120.98±365.76	FB
					Global Fibrosis	cifQTL 4				rs3700830	19.569	30.0551	c11.loc55	57.3605	80.0206	2.66	3660.38467±258.487949	5032.3129±267.2527	FB
				Young mice	Global Fibrosis	ycifQTL 3				rs13480836	2.3605	3.36782	c11.loc60	62.3605	98.6114	1.95	3216.8903±275.96858	4505.95357±285.654619	FB
					Subendocardial Fibrosis	ycifQTL 6				rs13480836	2.3605	3.36782	rs3712881	82.8018	117.608	1.72	3837.96±385.9	5513.15±399.456	FB
			Doxorubicin	The whole cohort of mice	Subendoncardial Fibrosis	difQTL 5	rs13481109	47.596	80.22	c11.loc10	12.3605	19.73	c11.loc50	52.3605	88.13	1.84553	3431.75±649.83	6287.32±668.09	FB
				Young mice	Global Fibrosis	ydifQTL 2	rs13481119	48.0228	80.6	gnf11.017.294	12.326	19.72	rs3714299	61.1322	97.82	2.38	2424.6487±989.35157	6934.3325±954.79684	FB
					Subendocardial Fibrosis	ydifQTL 5				gnf11.017.294	12.326	19.7233	c11.loc50	52.3605	88.1396	2.38	2585.535±1134.1922	8317.00175±1067.0153	FB
		cda-QTL14	Doxorubicin	The whole cohort of mice	Subepicardial Cardiomyocyte Area	dcaQTL 4	rs6393948	70.164	107.106	rs13480836	2.3605	3.36782	rs3712881	82.8018	117.608	1.58198	74.49±2.22	83.49±2.27	FB
	12	cda-QTL15	Doxorubicin	The whole cohort of mice	Global Cardiomyocyte Area	dcaQTL 1	c12.loc40	47.815	97.3362	rs13481514	36.305	79.8349	rs3023711	68.3597	128.388	3.11	77.66135±2.0599526	90.573168±2.6687029	FB
					Subepicardial Cardiomyocyte Area	dcaQTL 5			93.1335	c12.loc30	37.815	71.3866				2.63417	74.58±1.95	85.96±2.52	FB
					Subendocardial Cardiomyocyte Area	dcaQTL 7	c12.loc37.5	45.315	93.6499	rs3706319	32.2507	74.1318				2.36324	80.13±2.72	95.28±3.33	FB
		cda-QTL16	Doxorubicin	Old mice	Global Cardiomyocyte Area	odcaQTL 2	rs3023711	68.3597	128.371	c12.loc27.5	35.315	77.8408	rs3023711	68.3597	128.371	2.7	78.0920335±2.35555	91.276029±2.519983	FB
					Subepicardial Cardiomyocyte Area	odcaQTL 6				c12.loc30	37.815	81.5846				3.41	73.51473±2.2824279	88.34409±2.453078	FB
					Subendocardial Cardiomyocyte Area	odcaQTL 9				c12.loc22.5	30.315	72.7782				1.61	82.66838±2.7945857	94.1836±2.95227	FB
	13	cda-QTL17	Combined therapy	Younge mice	Global Cardiomyocyte Area	yccaQTL 2	rs13481783	28.1268	53.5416	rs6215262	2.3313	4.19351	rs13482035	73.196	129.679	1.68	75.3516417±2.349613	85.09157±2.2699419	FB
					Subendocardial Cardiomyocyte Area	yccaQTL 4										1.53	75.13505±2.8275829	86.237±2.7317	FB
	14	cda-QTL18	Doxorubicin	Young mice	Subepicardial Cardiomyocyte Area	ydcaQTL 3	CEL-14_116404928	72.259	135.713	rs4230144	5.112	8.97006	CEL-14_116404928	72.259	135.713	2.05	71.09969±2.82139	89.18918±4.516619	FB
	Chr.	cda-QTL	Therapy Cohort	Age Cohort	Pathophenotype	Condition QTL	Peak marker			5´extreme marker			3` extreme marker			LOD Score	Average ± SEM		Higher Effect Allele
							SNP	Location		SNP	Location		SNP	Location			FF	FC
								(cM)	(Mb)		(cM)	(Mb)		(cM)	(Mb)
	15	cda-QTL19	Doxorubicin	The whole cohort of mice	Subepicardial Cardiomyocyte Area	dcaQTL 6	CEL-15_8331158	5.965	12.5494	rs13482418	1.958	4.37516	c15.loc27.5	29.458	68.1187	2.0692	74.04±2.22	83.86±2.25	FB
					Subendoncardial Fibrosis	difQTL 6	rs3711814	9.49901	25.74			4.37	rs13482712	54.631	98.7	1.57107	6145.47±662.94	3489.77±660.19	FF
				Young mice	Global Fibrosis	ydifQTL 3						4.37	rs13482751	62.1624	109.06	2.1	6743.0221±927.31435	2283.960129±1038.0708	FF
					Subendocardial Fibrosis	ydifQTL 6						4.37516	c15.loc32.5	34.458	75.5142	2.1	7998.856±1052.3359	2493.35834±1201.73864	FF
		cda-QTL20	Doxorubicin	Old mice	Subepicardial Cardiomyocyte Area	odcaQTL 7	c15.loc17.5	19.458	51.8297	rs13482418	1.958	4.37516	c15.loc30	31.958	69.7342	2.17	74.911349±2.481569	86.653033±2.64809	FB
					Global Cardiomyocyte Area	odcaQTL 3	rs6188239	20.248	53.2064			4.37516	c15.loc30	31.958	69.7342	1.95	78.9112756±2.45625	90.3365179±2.619099	FB
		cda-QTL21	Combined therapy	The whole cohort of mice	Subepicardial Fibrosis	cifQTL 7	rs13482595	31.6039	69.5621	CEL-15_9687257	6.8709	13.8108	rs13482712	54.631	98.7007	1.57	3948.608±240.07377	2973.273±256.64966	FF
		cda-QTL22	Combined therapy	Old mice	Global Cardiomyocyte Area	occaQTL 1	rs13482751	62.1624	109.043	rs3665826	2.305	6.28754	rs13482751	62.1624	109.043	1.61	91.949889±3.4462736	78.074917±3.33684	FF
					Subendocardial Cardiomyocyte Area	occaQTL 5				c15.loc42.5	44.458	88.9538	rs13482751	62.1624	109.043	2.28	91.3446±2.809747	77.53207±2.7205259	FF
	17	cda-QTL23	Doxorubicin	Old mice	Subendocardial Cardiomyocyte Area	odcaQTL 10	c17.loc15	17.038	31.6733	rs4136382	2.038	3.57492	rs13483135	57.909	88.1024	2.03	80.91739±3.40359	92.2226±2.5648	FB
					Global Cardiomyocyte Area	odcaQTL 4	rs6397584	20.7949	44.3078	c17.loc7.5	9.538	16.3105	rs13483135	57.909	88.1024	1.7	77.232588±3.005047	88.333104±2.280015	FB
		cda-QTL24	Doxorubicin	The whole cohort of mice	Subendocardial Cardiomyocyte Area	dcaQTL 8	rs13483117	54.38	83.693	c17.loc5	7.038	9.44559	rs13483144	59.7522	89.8504	1.66347	79.34±3.22	91.89±2.92	FB
					Global Cardiomyocyte Area	dcaQTL 2				c17.loc10	12.038	23.7577	c17.loc57.5	59.538	89.6043	1.99	76.69934±2.4996458	87.32751±2.245958	FB
	18	cda-QTL25	Doxorubicin	Young mice	Global Cardiomyocyte Area	ydcaQTL 1	rs13483212	6.6249	12.5095	rs13483183	2.3969	3.77452	c18.loc25	27.3969	50.6001	2.23	69.5567±3.8875289	89.362534±3.76678	FB
					Subepicardial Cardiomyocyte Area	ydcaQTL 4	rs6358426	12.3358	23.7386			3.77452	c18.loc30	32.3969	58.3306	1.87	70.381719±6.41619	92.8477528±5.593523	FB
		cda-QTL26	Combined therapy	Old mice	Subepicardial Cardiomyocyte Area	occaQTL 3	gnf18.051.412	35.924	62.9477	c18.loc15	17.3969	30.2458	c18.loc57.5	59.8969	90.8444	1.62	77.51109±4.1797645	96.231679±4.9183155	FB
					Global Cardiomyocyte Area	occaQTL 2	rs8237402	43.7728	69.9259	rs3722973	23.991	45.0874				1.99	79.876099±3.272919	91.590548±3.85123378	FB
					Subendocardial Cardiomyocyte Area	occaQTL 6				c18.loc20	22.3969	42.2283				1.67	78.3635116±2.845363	90.4577±2.938678	FB
	19	cda-QTL27	Combined therapy	The whole cohort of mice	Subepicardial Fibrosis	cifQTL 8	rs3655407	38.759	45.797	c19.loc10	14.394	21.3288	rs6304326	49.394	54.1936	1.74	4243.16947±309.5516	3146.02195±210.7259059	FF
					Global Cardiomyocyte Area	ccaQTL 3	rs3023496	43.7272	49.248	CEL-19_12595293	10.207	15.0193	UT_4_59.889271	55.571	59.5382	1.71	71.53805±3.7257838	85.337638±2.9609527	FB
			Doxorubicin	Old mice	Global Fibrosis	odifQTL 3	UT_4_59.889271	55.571	59.5382	rs6236348	4.394	6.04741	UT_4_59.889271	55.571	59.5382	1.89	2978.319317±517.245389	5646.1157±690.8066	FB
				The whole cohort of mice	Global Cardiomyocyte Area	dcaQTL 3						6.04741				1.55	86.92157±2.331648	77.53717±2.500806	FF
					Subendocardial Cardiomyocyte Area	dcaQTL 9				c19.loc7.5	11.894	16.7047				1.59957	91.85±2.98	79.73±3.19	FF
