# Supplementary material for: Intermediate Molecular Phenotypes to Identify Genetic Markers of Anthracycline-Induced Cardiotoxicity Risk
Source: Cells. 2023 Jul 27;12(15):1956. doi: 10.3390/cells12151956 (PMC10417374; doi:10.3390/cells12151956)
Supplement: Supplementary file 1 [file cells-12-01956-s001.zip › Table_S8.xlsx]

## Sheet: Table S8
			Treatment	Mice	Pathophenotype of CDA	condition-QTL	Marker Peak	Location	LOD Score	Chr.
								(cM)
		cdaQTL6	Doxorubicin	Whole Cohort	Global Fibrosis	difQTL 1	rs13478089	95.0516	2.49	4
					Subepicardial Fibrosis	difQTL3	rs13478089	95.0516	2.41
					Subendocardial Fibrosis	difQTL4	rs13478089	95.0516	2.13
				Old Mice	Global Fibrosis	odifQTL2	rs13478068	97.06	2.29
					Subedpicardial Fibrosis	odifQTL5	rs13478068	97.06	2.19
					Subendocardial Fibrosis	odifQTL7	rs13478002	80.1759	2.69
					Global Cardiomyocyte Area	odcaQTL1	rs4224864	81.44	1.66
					Subendocardial Cardiomyocyte Area	odcaQTL8	rs4224864	81.44	1.78
		cdaQTL13	Doxorubicin	Whole Cohort	Subendocardial Fibrosis	difQTL5	rs13481119	47.596	1.85	11
				Young Mice	Global Fibrosis	ydifQTL2	rs13481119	48.0228	2.38
					Subendocardial Fibrosis	ydifQTL5	rs13481119	48.0228	2.4
			Combined therapy	Whole Cohort	Global Fibrosis	cifQTL4	rs13481076	42.678	2.66
					Subendocardial Fibrosis	cifQTL11	rs13481076	42.678	2.62
				Young Mice	Global Fibrosis	ycifQTL3	rs13481076	42.678	1.95
					Subendocardial Fibrosis	ycifQTL6	rs13481076	42.678	1.72
