# Supplementary material for: Intermediate Molecular Phenotypes to Identify Genetic Markers of Anthracycline-Induced Cardiotoxicity Risk
Source: Cells. 2023 Jul 27;12(15):1956. doi: 10.3390/cells12151956 (PMC10417374; doi:10.3390/cells12151956)
Supplement: Supplementary file 1 [file cells-12-01956-s001.zip › Table_S9.xlsx]

## Sheet: Table S9
		A.) Genetic models with cdaQTL6
		Models of Global Fibrosis and cdaQTL6 in Older Mice (doxorubicin therapy)
		Model-1: cdaQTL6 * dox-ipQTL81	Chr. (cM)	Alternative QTL name	Fibrosis LOD score	Fibrosis, % variability explained	P-value (Chi-square)	Improvement
		cdaQTL6	Chr.4 (97.1 cM)	odifQTL 2	2.24555	21.1421	0.006	NO
		dox-ipQTL81	Chr.2 (19.1 cM)	JNK (T183/Y185) ipQTL @ Chr.2	0.00813	0.06774	0.981
		cdaQTL6 : dox-ipQTL81	n.a.	n.a.	0.007148	0.05955	0.856
		Model-2: cdaQTL6 * dox-ipQTL76	Chr. (cM)	Alternative QTL name	Fibrosis LOD score	Fibrosis, % variability explained	P-value (Chi-square)	Improvement
		cdaQTL6	Chr.4 (97.1 cM)	odifQTL 2	2.5512	23.881	0.003	NO
		dox-ipQTL76	Chr.3 (72.5 cM)	ɤH2AX (S139) ipQTL @ Chr.3	0.2215	1.825	0.6
		cdaQTL6 : dox-ipQTL76	n.a.	n.a.	0.2182	1.797	0.316
		Model-3: cdaQTL6 * dox-ipQTL77	Chr. (cM)	Alternative QTL name	Fibrosis LOD score	Fibrosis, % variability explained	P-value (Chi-square)	Improvement
		cdaQTL6	Chr.4 (97.1 cM)	odifQTL 2	2.6976	23.66	0.00358	NO
		dox-ipQTL77	Chr.5 (62.7 cM)	ɤH2AX (S139)- ipQTL @ Chr.5	0.9062	7.199	0.15068
		cdaQTL6 : dox-ipQTL77	n.a.	n.a.	0.4864	3.777	0.15671
		Model-4: cdaQTL6 * dox-ipQTL78	Chr. (cM)	alternative QTL name	Fibrosis LOD score	Fibrosis, % variability explained	P-value (Chi-square)	Improvement
		cdaQTL6	Chr.4 (97.1 cM)	odifQTL 2	2.4597	23.016	0.003	NO
		dox-ipQTL78	Chr.12 (37.9 cM)	ɤH2AX (S139) ipQTL @ Chr12	0.1773	1.464	0.665
		cda-QTL6 : dox-ipQTL78	n.a.	n.a.	0.1607	1.326	0.39
		Model-5: cda-QTL6 * dox-ipQTL76 * dox-ipQTL78	Chr. (cM)	Alternative QTL name	Fibrosis LOD score	Fibrosis, % variability explained	P-value (Chi-square)	Improvement
		cdaQTL6	Chr.4 (97.1 cM)	odifQTL 2	5.845	42.77	0	YES
		dox-ipQTL76	Chr.3 (72.5 cM)	ɤH2AX (S139) ipQTL @ Chr.3	4.113	27.21	0.001
		dox-ipQTL78	Chr.12 (37.9 cM)	ɤH2AX (S139) ipQTL @ Chr12	4.069	26.85	0.001
		cdaQTL6 : dox-ipQTL76	n.a.	n.a.	2.505	15.13	0.003
		dox-ipQTL76 : dox-ipQTL78	n.a.	n.a.	3.791	24.62	0
		cdaQTL6 : dox-ipQTL78	n.a.	n.a.	2.431	14.62	0.004
		cdaQTL6 : dox-ipQTL76 : dox-ipQTL78	n.a.	n.a.	1.813	10.54	0.004
		Model-6: cdaQTL6 * dox-ipQTL76 * dox-ipQTL77	Chr. (cM)	Alternative QTL name	Fibrosis LOD score	Fibrosis, % variability explained	P-value (Chi-square)	Improvement
		cdaQTL6	Chr.4 (97.1 cM)	odifQTL 2	2.60657	22.125	0.017	NO
		dox-ipQTL76	Chr.3 (72.5 cM)	ɤH2AX (S139) ipQTL @ Chr.3	0.25793	1.9244	0.88
		dox-ipQTL77	Chr.5 (62.7 cM)	ɤH2AX (S139) ipQTL @ Chr.5	0.94267	7.2988	0.362
		cdaQTL6 : dox-ipQTL76	n.a.	n.a.	0.2154	1.6034	0.609
		dox-ipQTL76 : dox-ipQTL77	n.a.	n.a.	0.10022	0.7414	0.794
		cdaQTL6 : dox-ipQTL77	n.a.	n.a.	0.21366	1.5904	0.611
		cdaQTL6 : dox-ipQTL76 : dox-ipQTL77	n.a.	n.a.	0.01516	0.1117	0.792
		Model-7: cdaQTL6 * dox-ipQTL77 * dox-ipQTL78	Chr. (cM)	Alternative QTL name	Fibrosis LOD score	Fibrosis, % variability explained	P-value (Chi-square)	Improvement
		cdaQTL6	Chr.4 (97.1 cM)	odifQTL 2	3.3736	26.03	0.004	YES
		dox-ipQTL77	Chr.5 (62.7 cM)	ɤH2AX (S139) ipQTL @ Chr.5	2.2816	16.556	0.033
		dox-ipQTL78	Chr.12 (37.9 cM)	ɤH2AX (S139) ipQTL @ Chr.12	1.5527	10.821	0.128
		cdaQTL6 : dox-ipQTL77	n.a.	n.a.	1.0983	7.466	0.08
		cdaQTL6 : dox-ipQTL78	n.a.	n.a.	0.688	4.574	0.205
		dox-ipQTL77 : dox-ipQTL78	n.a.	n.a.	1.2219	8.362	0.06
		cdaQTL6 : dox-ipQTL77 : dox-ipQTL78	n.a.	n.a.	0.4371	2.866	0.156
		Model-8: cdaQTL6 * dox-ipQTL81 * dox-ipQTL76	Chr. (cM)	Alternative QTL name	Fibrosis LOD score	Fibrosis, % variability explained	P-value (Chi-square)	Improvement
		cdaQTL6	Chr.4 (97.1 cM)	odifQTL 2	2.37028	21.1747	0.028	NO
		dox-ipQTL81	Chr.2 (19.1 cM)	JNK (T183/Y185) ipQTL @ Chr.2	0.3419	2.7328	0.813
		dox-ipQTL76	Chr.3 (72.5 cM)	ɤH2AX (S139) ipQTL @ Chr.3	0.55527	4.4896	0.634
		dox-ipQTL81 : dox-ipQTL76	n.a.	n.a.	0.32061	2.5596	0.478
		cdaQTL6 : dox-ipQTL81	n.a.	n.a.	0.07445	0.5866	0.842
		cdaQTL6 : dox-ipQTL76	n.a.	n.a.	0.39485	3.165	0.403
		cdaQTL6 : dox-ipQTL81 : dox-ipQTL76	n.a.	n.a.	0.07315	0.5763	0.562
		Model-9: cdaQTL6 * dox-ipQTL81 * dox-ipQTL78		Alternative QTL name	Fibrosis LOD score	Fibrosis, % variability explained	P-value (Chi-square)	Improvement
		cdaQTL6	Chr.4 (97.1 cM)	odifQTL 2	3.665	30.757	0.002	YES
		dox-ipQTL81	Chr.2 (19.1 cM)	JNK (T183/Y185) ipQTL @ Chr.2	1.653	12.388	0.107
		dox-ipQTL78	Chr.12 (37.9 cM)	ɤH2AX (S139) ipQTL @ Chr12	1.822	13.784	0.078
		cdaQTL6 : dox-ipQTL81	n.a.	n.a.	1.164	8.497	0.068
		dox-ipQTL78 : dox-ipQTL81	n.a.	n.a.	1.652	12.384	0.022
		cdaQTL6 : dox-ipQTL78	n.a.	n.a.	1.443	10.691	0.036
		cdaQTL6 : dox-ipQTL81 : dox-ipQTL78	n.a.	n.a.	1.164	8.493	0.021
		Model-10: cdaQTL6 * dox-ipQTL81 * dox-ipQTL77	Chr. (cM)	Alternative QTL name	Fibrosis LOD score	Fibrosis, % variability explained	P-value (Chi-square)	Improvement
		cdaQTL6	Chr.4 (97.1 cM)	odifQTL 2	3.0171	25.757	0.008	NO
		dox-ipQTL81	Chr.2 (19.1 cM)	JNK (T183/Y185) ipQTL @ Chr.2	0.4201	3.108	0.748
		dox-ipQTL77	Chr.5 (62.7 cM)	ɤH2AX (S139) ipQTL @ Chr5	1.3182	10.239	0.194
		cdaQTL6 : dox-ipQTL81	n.a.	n.a.	0.3115	2.291	0.488
		dox-ipQTL77 : dox-ipQTL81	n.a.	n.a.	0.4044	2.989	0.394
		cdaQTL6 : dox-ipQTL77	n.a.	n.a.	0.7329	5.514	0.185
		cdaQTL6 : dox-ipQTL77 : dox-ipQTL81	n.a.	n.a.	0.3115	2.291	0.231
		B.) Genetic models with cda-QTL13
		B.1) Models of Global Fibrosis and cda-QTL13 (QTL Chr.11) in Younger Mice (doxorubicin)
		Model-11: cdaQTL13 * dox-ipQTL51	Chr. (cM)	Alternative QTL name	Fibrosis LOD score	Fibrosis, % variability explained	P-value (Chi-square)	Improvement
		cdaQTL13	Chr.11 (48.0 cM)	ydifQTL 2	3.771	47.33	0	YES
		dox-ipQTL51	Chr.3 (85.6 cM)	p70S6K (T412)- ipQTL @ Chr.3	1.79	18.73	0.016
		cdaQTL13 : dox-ipQTL51	n.a.	n.a.	1.365	13.75	0.012
		Model-12: cdaQTL13 * dox-ipQTL52	Chr. (cM)	alternative QTL name	Fibrosis LOD score	Fibrosis, % variability explained	P-value (Chi-square)	Improvement
		cdaQTL13	Chr.11 (48.0 cM)	ydifQTL 2	1.88811	24.6733	0.013	NO
		dox-ipQTL52	Chr.4 (95.1 cM)	p70S6K(T412) ipQTL @ Chr.4	0.5379	6.2398	0.29
		cdaQTL13 : dox-ipQTL52	n.a.	n.a.	0.04041	0.4492	0.666
		Model-13: cdaQTL13 * dox-ipQTL53	Chr. (cM)	Alternative QTL name	Fibrosis LOD score	Fibrosis, % variability explained	P-value (Chi-square)	Improvement
		cdaQTL13	Chr.11 (48.0 cM)	ydifQTL 2	2.1135	30.1832	0.008	NO
		dox-ipQTL53	Chr.9 (63.2 cM)	p70S6K (T412) ipQTL @ Chr.9	0.1362	1.6348	0.731
		cda-QTL13 : dox-ipQTL53	n.a.	n.a.	0.0627	0.7477	0.591
		Model-14: cdaQTL13 * dox-ipQTL54	Chr. (cM)	Alternative QTL name	Fibrosis LOD score	Fibrosis, % variability explained	P-value (Chi-square)	Improvement
		cdaQTL13	Chr.11 (48.0 cM)	ydifQTL 2	2.02551	28.5511	0.009	NO
		dox-ipQTL54	Chr.17 (49.5 cM)	p70S6K (T412) ipQTL @ Chr.17	0.16641	1.9919	0.682
		cdaQTL13 : dox-ipQTL54	n.a.	n.a.	0.07061	0.8383	0.569
		Model-15: cdaQTL13 * dox-ipQTL51 * dox-ipQTL52	Chr. (cM)	Alternative QTL name	Fibrosis LOD score	Fibrosis, % variability explained	P-value (Chi-square)	Improvement
		cdaQTL13	Chr.11 (48.0 cM)	ydifQTL 2	1.71134	13.772	0.096	NO
		dox-ipQTL51	Chr.3 (85.6 cM)	p70S6K(T412) ipQTL @ Chr.3	2.74939	24.3094	0.013
		dox-ipQTL52	Chr.4 (95.1 cM)	p70S6K(T412) ipQTL @ Chr.4	1.49709	11.8198	0.142
		dox-ipQTL51 : dox-ipQTL52	n.a.	n.a.	0.98061	7.3971	0.105
		cdaQTL13 : dox-ipQTL51	n.a.	n.a.	0.15761	1.1071	0.696
		cdaQTL13 : dox-ipQTL52	n.a.	n.a.	0.11495	0.8045	0.767
		cdaQTL13 : dox-ipQTL51 : dox-ipQTL52	n.a.	n.a.	0.09016	0.6296	0.519
		Model-16: cdaQTL13 * dox-ipQTL52 * dox-ipQTL53	Chr. (cM)	Alternative QTL name	Fibrosis LOD score	Fibrosis, % variability explained	P-value (Chi-square)	Improvement
		cdaQTL13	Chr.11 (48.0 cM)	ydifQTL 2	2.0159	25.069	0.054	NO
		dox-ipQTL52	Chr.4 (95.1 cM)	p70S6K (T412) ipQTL @ Chr.4	0.7599	8.455	0.478
		dox-ipQTL53	Chr.9 (63.2 cM)	p70S6K (T412) ipQTL @ Chr.9	0.3583	3.85	0.8
		dox-ipQTL52 : ipQTL53	n.a.	n.a.	0.2645	2.819	0.544
		cdaQTL13: dox-ipQTL52	n.a.	n.a.	0.1398	1.474	0.725
		cdaQTL13 : dox-ipQTL53	n.a.	n.a.	0.3255	3.487	0.473
		cdaQTL13: dox-ipQTL52 : dox-ipQTL53	n.a.	n.a.	0.1259	1.326	0.446
		Model-17: cdaQTL13 * dox-ipQTL51 * dox-ipQTL54	Chr. (cM)	Alternative QTL name	Fibrosis LOD score	Fibrosis, % variability explained	P-value (Chi-square)	Improvement
		cdaQTL13	Chr.11 (48.0 cM)	ydifQTL 2	4.7415	53.154	0.00289	YES
		dox-ipQTL51	Chr.3 (85.6 cM)	p70S6K (T412) ipQTL @ Chr.3	2.8306	26.495	0.04725
		dox-ipQTL54	Chr.17 (49.5 cM)	p70S6K (T412) ipQTL @ Chr.17	1.2068	9.758	0.39157
		cdaQTL13 : dox-ipQTL51	n.a.	n.a.	1.9631	16.979	0.04155
		dox-ipQTL51 : dox-ipQTL54	n.a.	n.a.	0.2921	2.181	0.62297
		cdaQTL13 : dox-ipQTL54	n.a.	n.a.	0.8355	6.539	0.25826
		cdaQTL13 : dox-ipQTL51 : dox-ipQTL54	n.a.	n.a.	0.1704	1.259	0.46331
		Model-18: cdaQTL13 * dox-ipQTL51 * dox-ipQTL53	Chr. (cM)	Alternative QTL name	Fibrosis LOD score	Fibrosis, % variability explained	P-value (Chi-square)	Improvement
		cdaQTL13	Chr.11 (48.0 cM)	ydifQTL 2	5.6372	55.091	0	YES
		dox-ipQTL51	Chr.3 (85.6 cM)	p70S6K (T412) ipQTL @ Chr.3	4.1785	35.445	0.001
		dox-ipQTL53	Chr.9 (63.2 cM)	p70S6K (T412) ipQTL @ Chr.9	2.5245	18.351	0.02
		dox-ipQTL51 : dox-ipQTL53	n.a.	n.a.	2.261	16.046	0.005
		cdaQTL13 : dox-ipQTL51	n.a.	n.a.	1.9408	13.381	0.011
		cdaQTL13 : dox-ipQTL53	n.a.	n.a.	0.7399	4.587	0.182
		cdaQTL13 : dox-ipQTL51 : dox-ipQTL53	n.a.	n.a.	0.7294	4.517	0.067
		Model-19: cdaQTL13 * dox-ipQTL52 * dox-ipQTL54	Chr. (cM)	Alternative QTL name	Fibrosis LOD score	Fibrosis, % variability explained	P-value (Chi-square)	Improvement
		cdaQTL13	Chr.11 (48.0 cM)	ydifQTL 2	2.3749	25.37	0.027	NO
		dox-ipQTL52	Chr.4 (95.1 cM)	p70S6K (T412) ipQTL @ Chr4	1.8111	18.387	0.08
		dox-ipQTL54	Chr.17 (49.5 cM)	p70S6K (T412) ipQTL @ Chr17	1.4396	14.139	0.157
		cdaQTL13 : dox-ipQTL52	n.a.	n.a.	0.185	1.628	0.653
		dox-ipQTL52 : dox-ipQTL54	n.a.	n.a.	1.1991	11.528	0.063
		cdaQTL13 : dox-ipQTL54	n.a.	n.a.	1.0152	9.604	0.097
		cdaQTL13 : dox-ipQTL52 : dox-ipQTL54	n.a.	n.a.	0.1112	0.973	0.474
		B.2) Models of Global Fibrosis and cda-QTL13 (Chr.11 QTL) in Younger Mice (combined therapy)
		Model-20: cdaQTL13 * comb-ipQTL29	Chr. (cM)	Alternative QTL name	Fibrosis LOD score	Fibrosis, % variability explained	P-value (Chi-square)	Improvement
		cdaQTL13	Chr.11 (42.7 cM)	ycifQTL 4	1.7818	20.555	0.017	NO
		comb-ipQTL29	Chr.2 (62.7 cM)	CREB (S133) ipQTL @ Chr2	0.9739	10.512	0.106
		cdaQTL13 : comb-ipQTL29	n.a.	n.a.	0.1966	1.993	0.341
