# Supplementary material for: Intermediate Molecular Phenotypes to Identify Genetic Markers of Anthracycline-Induced Cardiotoxicity Risk
Source: Cells. 2023 Jul 27;12(15):1956. doi: 10.3390/cells12151956 (PMC10417374; doi:10.3390/cells12151956)
Supplement: Supplementary file 1 [file cells-12-01956-s001.zip › Table_S10.xlsx]

## Sheet: Table S10
	SNP_ID	GEN	Func.refGene	CHR	POS	Cohort	Model	Controls (1)	Cases (2)	OR	p-value
	rs12103893	STAT3	intronic	17	40479535	Pediatric	Codominant	A/A=34 - A/B=13 - B/B=3	A/A=8 - A/B=12 - B/B=0	A/A=1 - A/B=3.92 - B/B=0	0.0295877
						CMR Def3	Codominant	A/A=5 - A/B=5 - log-Additive=NA - 0,1,2=10	A/A=12 - A/B=2 - log-Additive=NA - 0,1,2=14	A/A=1 - A/B=0.17 - log-Additive=NA - 0,1,2=0.17	0.0568018
	rs12601982	STAT3	intronic	17	40461674	Pediatric	Codominant	A/A=34 - A/B=13 - B/B=3	A/A=8 - A/B=12 - B/B=0	A/A=1 - A/B=3.92 - B/B=0	0.0295877
						CMR Def3	Codominant	A/A=5 - A/B=5 - log-Additive=NA - 0,1,2=10	A/A=12 - A/B=2 - log-Additive=NA - 0,1,2=14	A/A=1 - A/B=0.17 - log-Additive=NA - 0,1,2=0.17	0.0568018
	rs2293154	STAT3	intronic	17	40461003	Pediatric	Codominant	A/A=35 - A/B=13 - B/B=3	A/A=8 - A/B=12 - B/B=0	A/A=1 - A/B=4.04 - B/B=0	0.0210746
						CMR Def3	Codominant	A/A=5 - A/B=5 - log-Additive=NA - 0,1,2=10	A/A=12 - A/B=2 - log-Additive=NA - 0,1,2=14	A/A=1 - A/B=0.17 - log-Additive=NA - 0,1,2=0.17	0.0568018
	rs2293155	STAT3	intronic	17	40460989	Pediatric	Codominant	A/A=34 - A/B=13 - B/B=3	A/A=8 - A/B=12 - B/B=0	A/A=1 - A/B=3.92 - B/B=0	0.0295877
						CMR Def3	Codominant	A/A=5 - A/B=5 - log-Additive=NA - 0,1,2=10	A/A=12 - A/B=2 - log-Additive=NA - 0,1,2=14	A/A=1 - A/B=0.17 - log-Additive=NA - 0,1,2=0.17	0.0568018
	rs7215694	STAT3	intronic	17	40478591	Pediatric	Codominant	A/A=34 - A/B=13 - B/B=3	A/A=8 - A/B=12 - B/B=0	A/A=1 - A/B=3.92 - B/B=0	0.0295877
						CMR Def3	Codominant	A/A=5 - A/B=5 - log-Additive=NA - 0,1,2=10	A/A=12 - A/B=2 - log-Additive=NA - 0,1,2=14	A/A=1 - A/B=0.17 - log-Additive=NA - 0,1,2=0.17	0.0568018
	rs8064496	STAT3	intronic	17	40474864	Pediatric	Codominant	A/A=34 - A/B=13 - B/B=3	A/A=8 - A/B=12 - B/B=0	A/A=1 - A/B=3.92 - B/B=0	0.0295877
						CMR Def3	Codominant	A/A=5 - A/B=5 - log-Additive=NA - 0,1,2=10	A/A=12 - A/B=2 - log-Additive=NA - 0,1,2=14	A/A=1 - A/B=0.17 - log-Additive=NA - 0,1,2=0.17	0.0568018
	rs8077296	STAT3	intronic	17	40480521	Pediatric	Codominant	A/A=34 - A/B=13 - B/B=3	A/A=8 - A/B=12 - B/B=0	A/A=1 - A/B=3.92 - B/B=0	0.0295877
						CMR Def3	Codominant	A/A=5 - A/B=5 - log-Additive=NA - 0,1,2=10	A/A=12 - A/B=2 - log-Additive=NA - 0,1,2=14	A/A=1 - A/B=0.17 - log-Additive=NA - 0,1,2=0.17	0.0568018
	rs8081431	STAT3	intronic	17	40474880	Pediatric	Codominant	A/A=34 - A/B=13 - B/B=3	A/A=8 - A/B=12 - B/B=0	A/A=1 - A/B=3.92 - B/B=0	0.0295877
						CMR Def3	Codominant	A/A=5 - A/B=5 - log-Additive=NA - 0,1,2=10	A/A=12 - A/B=2 - log-Additive=NA - 0,1,2=14	A/A=1 - A/B=0.17 - log-Additive=NA - 0,1,2=0.17	0.0568018
	rs909056	STAT3	downstream	17	40464722	Pediatric	Codominant	A/A=34 - A/B=13 - B/B=3	A/A=8 - A/B=12 - B/B=0	A/A=1 - A/B=3.92 - B/B=0	0.0295877
						CMR Def3	Codominant	A/A=5 - A/B=5 - log-Additive=NA - 0,1,2=10	A/A=12 - A/B=2 - log-Additive=NA - 0,1,2=14	A/A=1 - A/B=0.17 - log-Additive=NA - 0,1,2=0.17	0.0568018
	rs9891867	STAT3	intronic	17	40468489	Pediatric	Codominant	A/A=35 - A/B=13 - B/B=3	A/A=8 - A/B=12 - B/B=0	A/A=1 - A/B=4.04 - B/B=0	0.0210746
						CMR Def3	Codominant	A/A=5 - A/B=5 - log-Additive=NA - 0,1,2=10	A/A=12 - A/B=2 - log-Additive=NA - 0,1,2=14	A/A=1 - A/B=0.17 - log-Additive=NA - 0,1,2=0.17	0.0568018
	rs9896889	STAT3	intronic	17	40477739	Pediatric	Codominant	A/A=34 - A/B=13 - B/B=3	A/A=8 - A/B=12 - B/B=0	A/A=1 - A/B=3.92 - B/B=0	0.0295877
						CMR Def3	Codominant	A/A=5 - A/B=5 - log-Additive=NA - 0,1,2=10	A/A=12 - A/B=2 - log-Additive=NA - 0,1,2=14	A/A=1 - A/B=0.17 - log-Additive=NA - 0,1,2=0.17	0.0568018
	rs9898884	STAT3	intronic	17	40476326	Pediatric	Codominant	A/A=34 - A/B=13 - B/B=3	A/A=8 - A/B=12 - B/B=0	A/A=1 - A/B=3.92 - B/B=0	0.0295877
						CMR Def3	Codominant	A/A=5 - A/B=5 - log-Additive=NA - 0,1,2=10	A/A=12 - A/B=2 - log-Additive=NA - 0,1,2=14	A/A=1 - A/B=0.17 - log-Additive=NA - 0,1,2=0.17	0.0568018
	rs8078731	STAT3	intronic	17	40480381	Pediatric	Codominant	A/A=34 - A/B=13 - B/B=3	A/A=8 - A/B=12 - B/B=0	A/A=1 - A/B=3.92 - B/B=0	0.0295877
						CMR Def3	Codominant	A/A=5 - A/B=5 - log-Additive=NA - 0,1,2=10	A/A=12 - A/B=2 - log-Additive=NA - 0,1,2=14	A/A=1 - A/B=0.17 - log-Additive=NA - 0,1,2=0.17	0.0568018
	rs4241793	CASP3	intronic	4	185558087	Pediatric	Dominant	A/A=17 - A/B-B/B=31	A/A=2 - A/B-B/B=18	A/A=1 - A/B-B/B=4.94	0.0230621
						CMR Def3	Dominant	A/A=0 - A/B-B/B=10	A/A=8 - A/B-B/B=6	A/A=1 - A/B-B/B=0	0.00642853
						CMR Def4	Codominant	A/A=0 - A/B=6 - B/B=1	A/A=8 - A/B=5 - B/B=4	A/A=1 - A/B=0 - B/B=0	0.0270786
	rs62338035	CASP3	intergenic	4	185545262	Pediatric	Dominant	A/A=19 - A/B-B/B=31	A/A=2 - A/B-B/B=18	A/A=1 - A/B-B/B=5.52	0.0134323
						CMR Def3	Dominant	A/A=0 - A/B-B/B=10	A/A=7 - A/B-B/B=6	A/A=1 - A/B-B/B=0	0.00748908
						CMR Def4	Codominant	A/A=0 - A/B=6 - B/B=1	A/A=7 - A/B=5 - B/B=4	A/A=1 - A/B=0 - B/B=0	0.0402028
	rs6948	CASP3	UTR3	4	185549130	Pediatric	Dominant	A/A=19 - A/B-B/B=31	A/A=2 - A/B-B/B=18	A/A=1 - A/B-B/B=5.52	0.0134323
						CMR Def3	Dominant	A/A=0 - A/B-B/B=10	A/A=7 - A/B-B/B=6	A/A=1 - A/B-B/B=0	0.00748908
						CMR Def4	Codominant	A/A=0 - A/B=6 - B/B=1	A/A=7 - A/B=5 - B/B=4	A/A=1 - A/B=0 - B/B=0	0.0402028
	rs2720376	CASP3	intronic	4	185554300	Pediatric	Dominant	A/A=19 - A/B-B/B=32	A/A=2 - A/B-B/B=18	A/A=1 - A/B-B/B=5.34	0.0153613
						CMR Def3	Dominant	A/A=0 - A/B-B/B=10	A/A=8 - A/B-B/B=6	A/A=1 - A/B-B/B=0	0.00642853
						CMR Def4	Codominant	A/A=0 - A/B=6 - B/B=1	A/A=8 - A/B=5 - B/B=4	A/A=1 - A/B=0 - B/B=0	0.0270786
	rs13435690	CASP3	intergenic	4	185545140	Pediatric	Dominant	A/A=19 - A/B-B/B=31	A/A=2 - A/B-B/B=18	A/A=1 - A/B-B/B=5.52	0.0134323
						CMR Def3	Dominant	A/A=0 - A/B-B/B=10	A/A=7 - A/B-B/B=6	A/A=1 - A/B-B/B=0	0.00748908
						CMR Def4	Codominant	A/A=0 - A/B=6 - B/B=1	A/A=7 - A/B=5 - B/B=4	A/A=1 - A/B=0 - B/B=0	0.0402028
	rs1405944	CASP3	intronic	4	185553353	Pediatric	Dominant	A/A=17 - A/B-B/B=32	A/A=2 - A/B-B/B=18	A/A=1 - A/B-B/B=4.78	0.0260852
						CMR Def3	Dominant	A/A=0 - A/B-B/B=10	A/A=8 - A/B-B/B=6	A/A=1 - A/B-B/B=0	0.00642853
						CMR Def4	Codominant	A/A=0 - A/B=6 - B/B=1	A/A=8 - A/B=5 - B/B=4	A/A=1 - A/B=0 - B/B=0	0.0270786
	rs2287498	TP53	exonic synonymous SNV	17	7592560	Breast	Dominant	A/A=248 - A/B-B/B=36	A/A=109 - A/B-B/B=27	A/A=1 - A/B-B/B=1.71	0.0585077
						CMR Def3	Codominant	A/A=6 - A/B=4 - log-Additive=NA - 0,1,2=10	A/A=14 - A/B=0 - log-Additive=NA - 0,1,2=14	A/A=1 - A/B=0 - log-Additive=NA - 0,1,2=0	0.0197628
						CMR Def4	Codominant	A/A=4 - A/B=3 - log-Additive=NA - 0,1,2=7	A/A=16 - A/B=1 - log-Additive=NA - 0,1,2=17	A/A=1 - A/B=0.08 - log-Additive=NA - 0,1,2=0.08	0.0347014
	rs34289079	TP53	intronic	17	7593319	Breast	Dominant	A/A=245 - A/B-B/B=39	A/A=106 - A/B-B/B=29	A/A=1 - A/B-B/B=1.72	0.0484048
						CMR Def3	Codominant	A/A=6 - A/B=3 - log-Additive=NA - 0,1,2=9	A/A=14 - A/B=0 - log-Additive=NA - 0,1,2=14	A/A=1 - A/B=0 - log-Additive=NA - 0,1,2=0	0.0474308
						CMR Def4	Codominant	A/A=4 - A/B=3 - log-Additive=NA - 0,1,2=7	A/A=16 - A/B=0 - log-Additive=NA - 0,1,2=16	A/A=1 - A/B=0 - log-Additive=NA - 0,1,2=0	0.0197628
	rs2498786	AKT1	upstream	14	105262368	Breast	Dominant	A/A=124 - A/B-B/B=160	A/A=43 - A/B-B/B=93	A/A=1 - A/B-B/B=1.68	0.0173402
						CMR Def3	Dominant	A/A=7 - A/B-B/B=3	A/A=4 - A/B-B/B=9	A/A=1 - A/B-B/B=5.25	0.0586305
